# Supplementary material
Source: PubMed Central journal article supplement (PMC2546573)
Supplement: NIHMS61733-supplement-si20061130_022.pdf [file NIHMS61733-supplement-si20061130_022.pdf]

Current Data Parameters  
 NAME Ph-3-HAO  
 EXPNO 1  
 PROCNO 1

F2 - Acquisition Parameters  
 Date\_ 20050524  
 Time 20.49  
 INSTRUM spect  
 PROBHD 5 mm GNP 1H  
 PULPROG zg  
 TD 16384  
 SOLVENT CDCl3  
 NS 16  
 DS 0  
 SMH 7183.908 Hz  
 FIDRES 0.438471 Hz  
 AQ 1.1403764 sec  
 RG 228.1  
 DW 69.600 usec  
 DE 6.00 usec  
 TE 300.0 K  
 D1 2.0000000 sec

===== CHANNEL f1 =====  
 NUC1 1H  
 P1 10.50 usec  
 PL1 0.00 dB  
 SF01 400.1328009 MHz

F2 - Processing parameters  
 SI 32768  
 SF 400.1300100 MHz  
 WDW EM  
 SSB 0  
 LB 0.30 Hz  
 GB 0  
 PC 1.00  
 1D NMR plot parameters  
 CX 20.00 cm  
 FJP 8.000 ppm  
 F1 3201.04 Hz  
 F2P 0.000 ppm  
 F2 0.00 Hz  
 PPMCM 0.40000 ppm/cm  
 HZCM 160.05200 Hz/cm

1.61486  
 1.79811  
 1.88292  
 1.89803

3.15290

3.73118  
 3.73635  
 3.87756

7.25993  
 7.27838  
 7.28285  
 7.30406  
 7.31660  
 7.32085  
 7.32577  
 7.33181  
 7.34559  
 7.35021

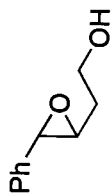

3a

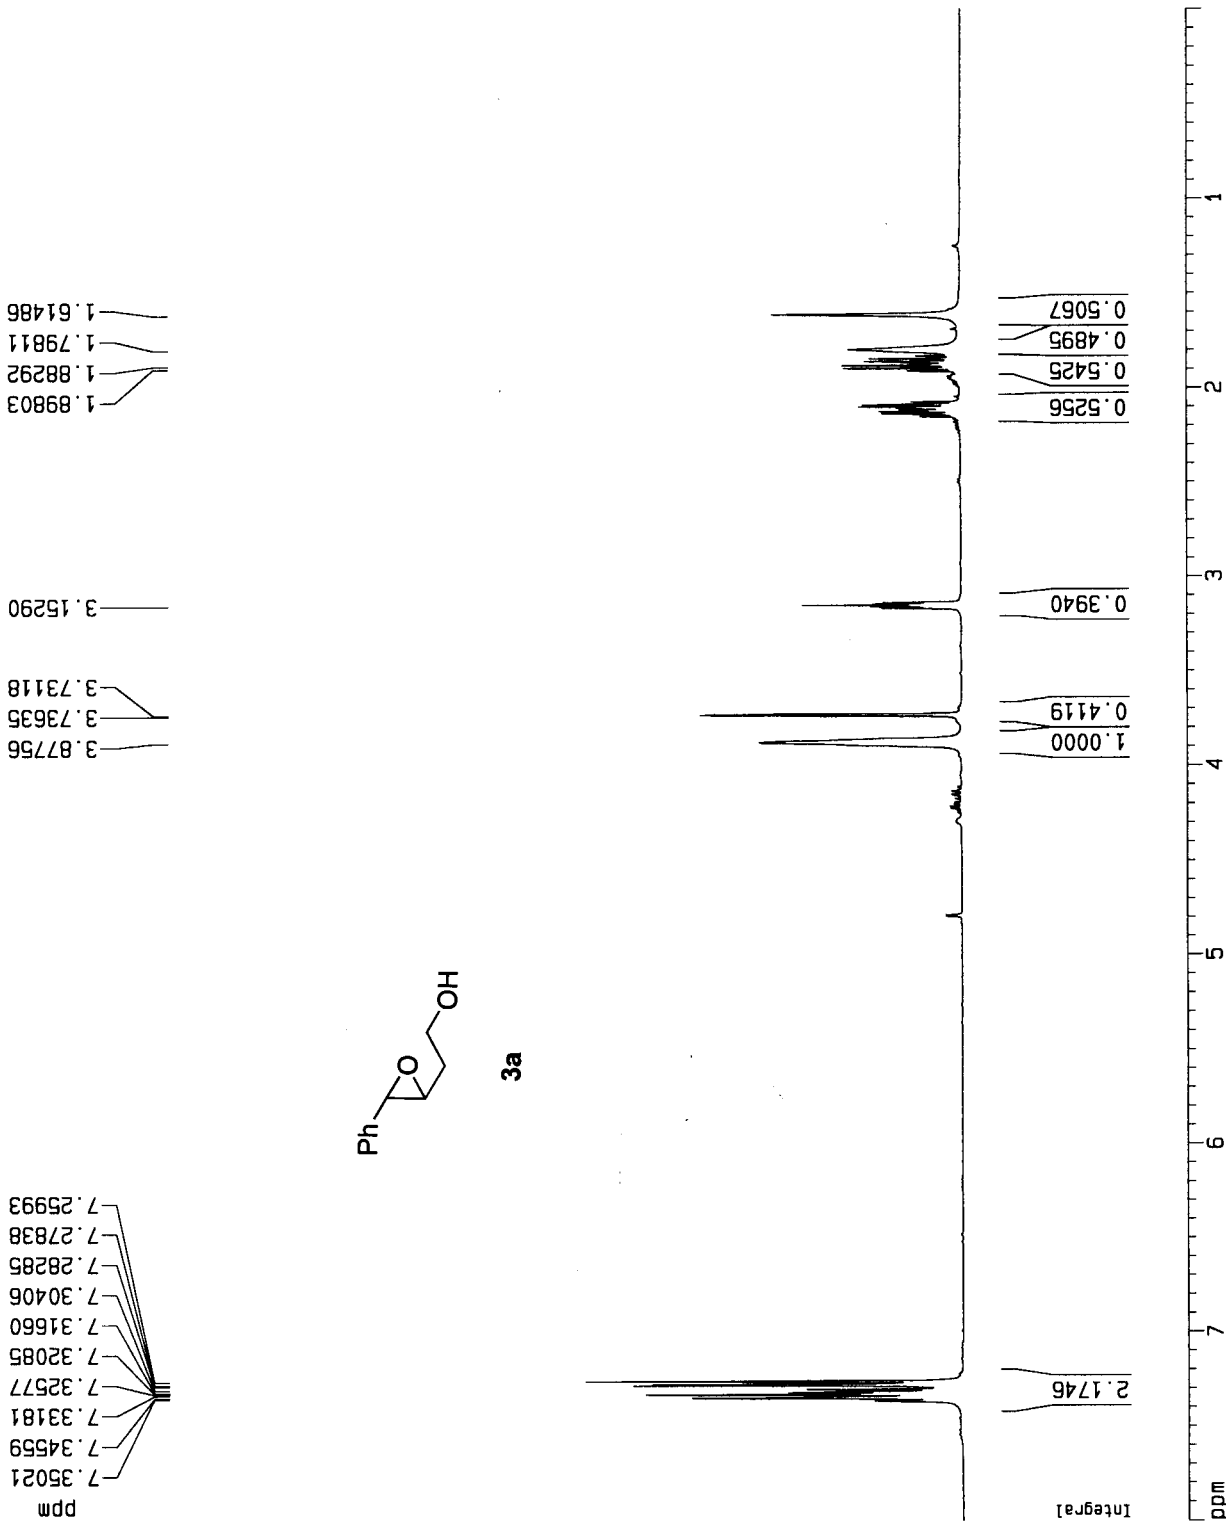

Current Data Parameters

NAME asdfg  
EXPNO 1  
PROCNO 1

F2 - Acquisition Parameters

Date\_ 20060227  
Time 21.47  
INSTRUM spect  
PROBHD 5 mm Multinu  
PULPROG zg  
TD 22320  
SOLVENT CDCl3  
NS 10  
DS 0  
SWH 5580.357 Hz  
FIDRES 0.250016 Hz  
AQ 1.9999220 sec  
RG 256  
DM 89.600 usec  
DE 7.00 usec  
TE 300.0 K  
D1 1.0000000 sec  
P1 8.50 usec  
SFO1 400.1320007 MHz  
NUC1 1H  
PL1 -6.00 dB

F2 - Processing parameters

SI 32768  
SF 400.1300083 MHz  
WDW EM  
SSB 0  
LB 0.30 Hz  
GB 0  
PC 1.00

1D NMR plot parameters

CX 20.00 cm  
F1P 8.000 ppm  
F1 3201.04 Hz  
F2P 0.000 ppm  
F2 0.00 Hz  
PPMCM 0.40000 ppm/cm  
HZCM 160.05200 Hz/cm

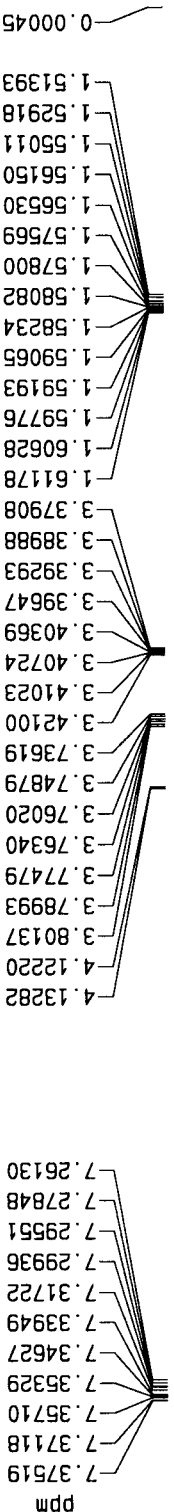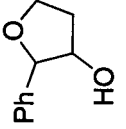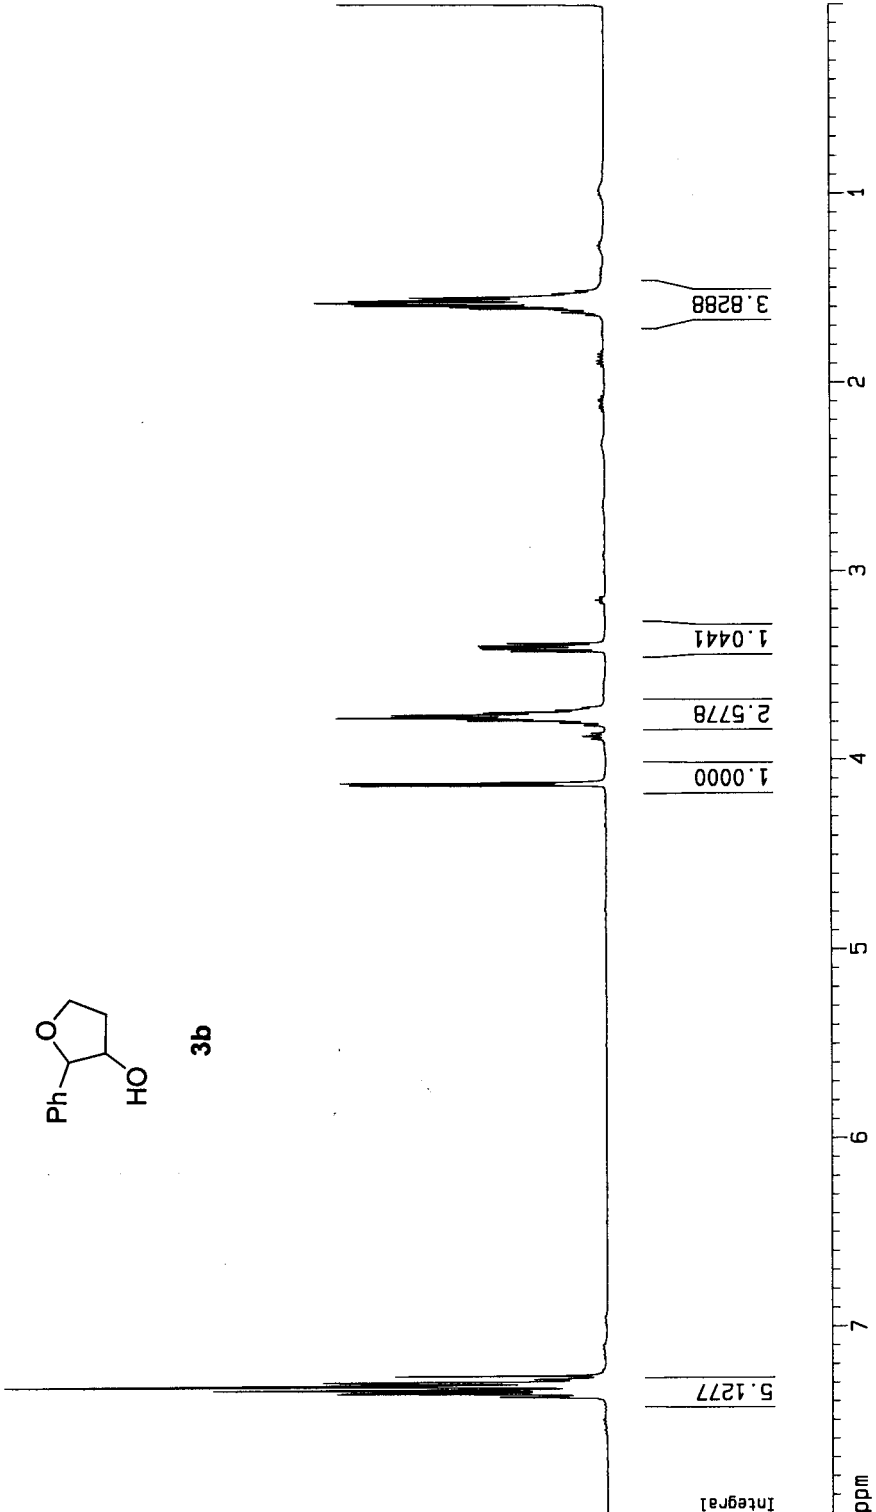

Current Data Parameters  
 NAME ZX-trans-Et  
 EXPNO 1  
 PROCNO 1

F2 - Acquisition Parameters  
 Date\_ 20061129  
 Time 21.23  
 INSTRUM spect  
 PROBHD 5 mm GNP 1H  
 PULPROG zg  
 TD 16384  
 SOLVENT CDCl3  
 NS 16  
 DS 0  
 SMH 4807.692 Hz  
 FIDRES 0.293438 Hz  
 AQ 1.7039860 sec  
 RG 20.2  
 DW 104.000 usec  
 DE 6.00 usec  
 TE 300.0 K  
 D1 2.00000000 sec

===== CHANNEL f1 =====  
 NUC1 1H  
 P1 10.50 usec  
 PL1 0.00 dB  
 SF01 400.1320007 MHz

F2 - Processing parameters  
 SI 32768  
 SF 400.1299900 MHz  
 WDW EM  
 SSB 0  
 LB 0.30 Hz  
 GB 0  
 PC 1.00  
 1D NMR plot parameters  
 CX 20.00 cm  
 F1P 8.000 ppm  
 F1 3201.04 Hz  
 F2P 0.000 ppm  
 F2 0.00 Hz  
 PPMCM 0.40000 ppm/cm  
 HZCM 160.05200 Hz/cm

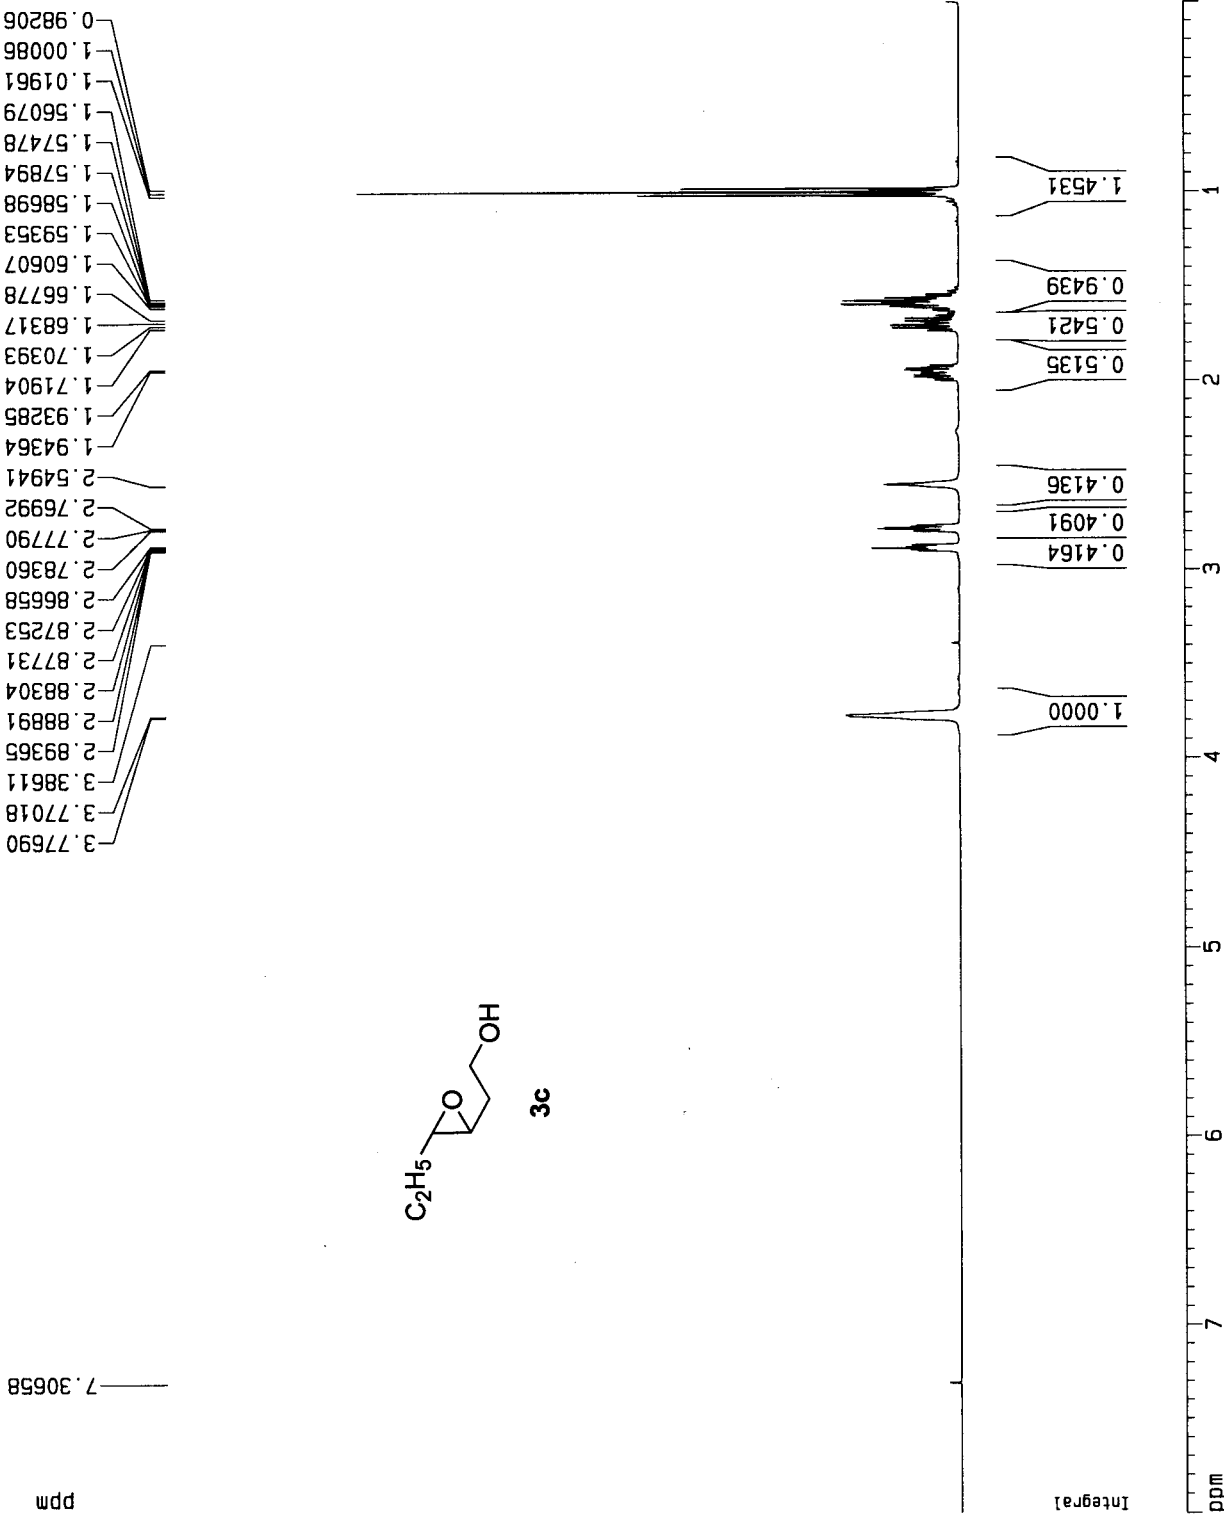

Current Data Parameters  
 NAME trans-9-HAO  
 EXPNO 1  
 PROCNO 1

F2 - Acquisition Parameters  
 Date\_ 20060619  
 Time 22.15  
 INSTRUM spect  
 PROBHD 5 mm GNP 1H  
 PULPROG zg  
 TD 16384  
 SOLVENT CDD13  
 NS 15  
 DS 0  
 SWH 4807.692 Hz  
 FIDRES 0.293438 Hz  
 AQ 1.7039860 sec  
 RG 101.6  
 DW 104.000 usec  
 DE 6.00 usec  
 TE 300.0 K  
 D1 2.0000000 sec

===== CHANNEL f1 =====

NUC1 1H  
 P1 10.50 usec  
 PL1 0.00 dB  
 SF01 400.1320007 MHz

F2 - Processing parameters  
 SI 32768  
 SF 400.1300063 MHz  
 WDW EM  
 SSB 0  
 LB 0.30 Hz  
 GB 0  
 PC 1.00

1D NMR plot parameters  
 CX 20.00 cm  
 F1P 8.000 ppm  
 F1 3201.04 Hz  
 F2P 0.000 ppm  
 F2 0.00 Hz  
 PPMCM 0.40000 ppm/cm  
 HZCM 160.05200 Hz/cm

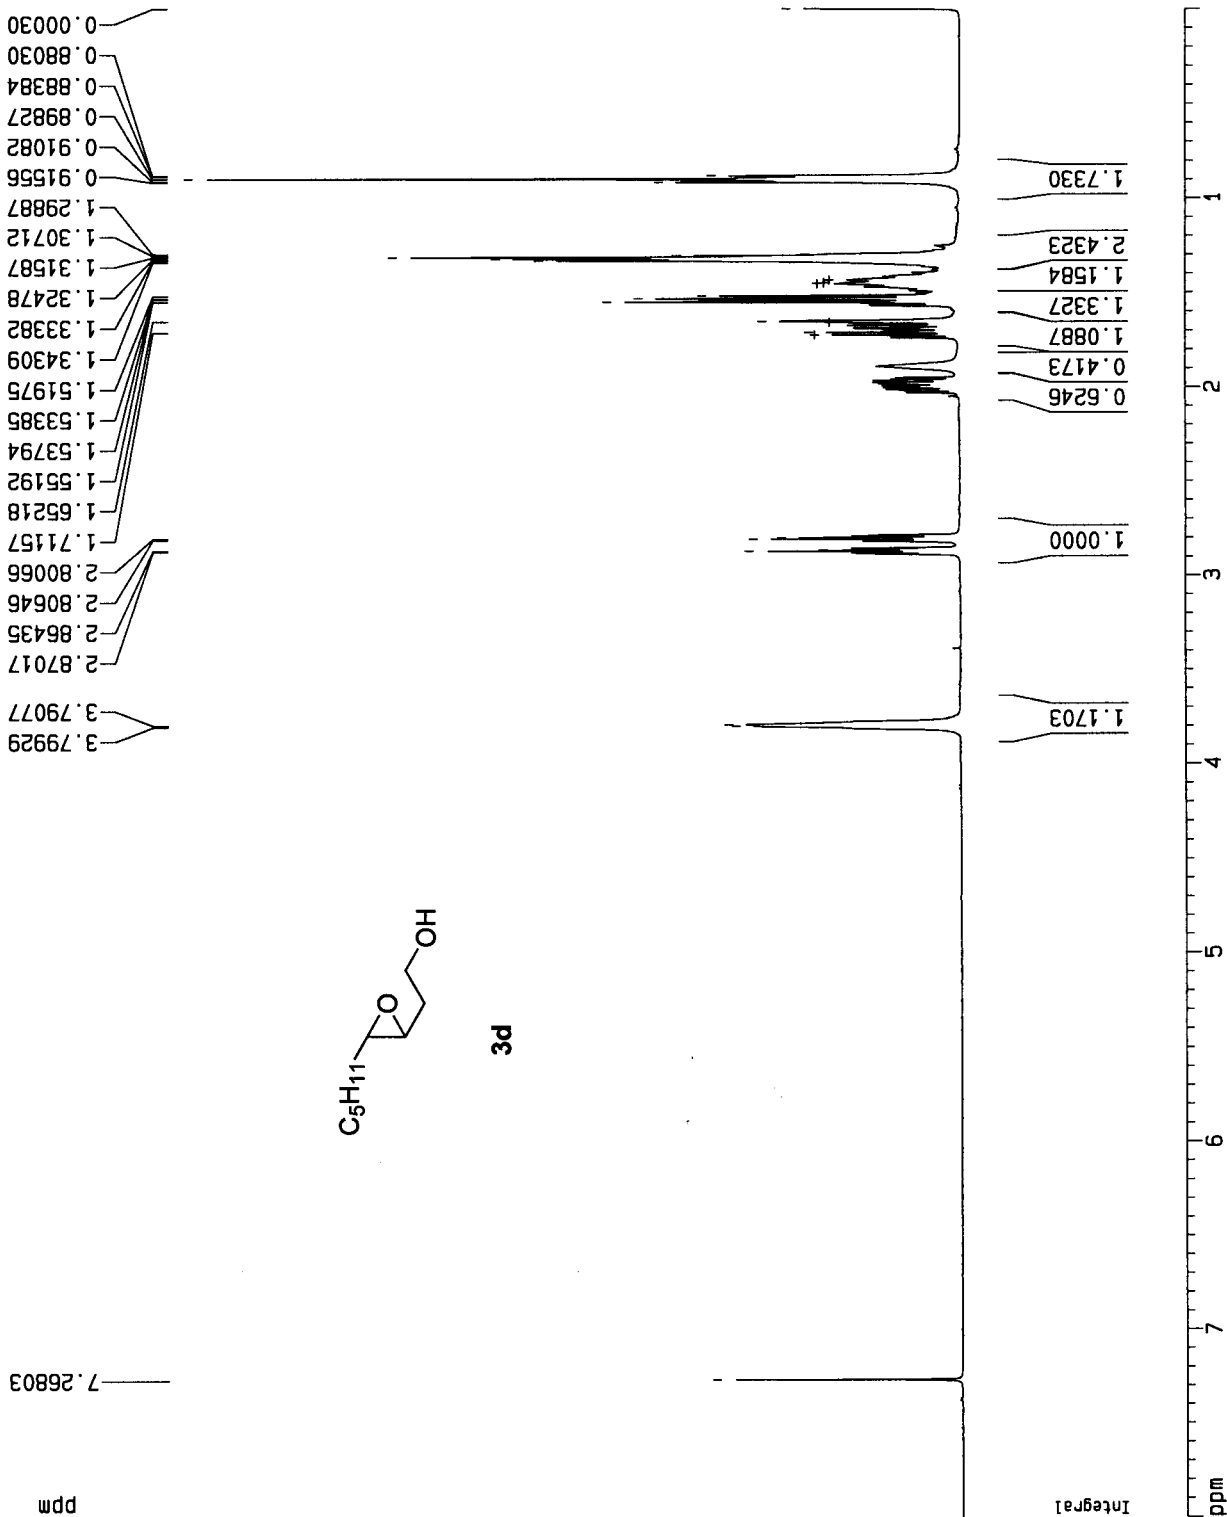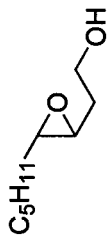

3d

Current Data Parameters  
 NAME trans-10-HAO  
 EXPNO 1  
 PROCNO 1

F2 - Acquisition Parameters  
 Date\_ 20060619  
 Time 22:20  
 INSTRUM spect  
 PROBHD 5 mm QNP 1H  
 PULPROG zg  
 TD 16384  
 SOLVENT CDC13  
 NS 4  
 DS 0  
 SWH 4807.692 Hz  
 FIDRES 0.293438 Hz  
 AQ 1.7039860 sec  
 RG 90.5  
 DW 104.000 usec  
 DE 6.00 usec  
 TE 300.0 K  
 D1 2.0000000 sec

===== CHANNEL f1 =====  
 NUC1 1H  
 P1 10.50 usec  
 PL1 0.00 dB  
 SF01 400.1320007 MHz

F2 - Processing parameters  
 SI 32768  
 SF 400.1300070 MHz  
 WDW EM  
 SSB 0  
 LB 0.30 Hz  
 GB 0  
 PC 1.00

1D NMR plot parameters  
 CX 20.00 cm  
 F1P 8.000 ppm  
 F1 3201.04 Hz  
 F2P 0.000 ppm  
 F2 0.00 Hz  
 PPMCM 0.40000 ppm/cm  
 HZCM 160.05200 Hz/cm

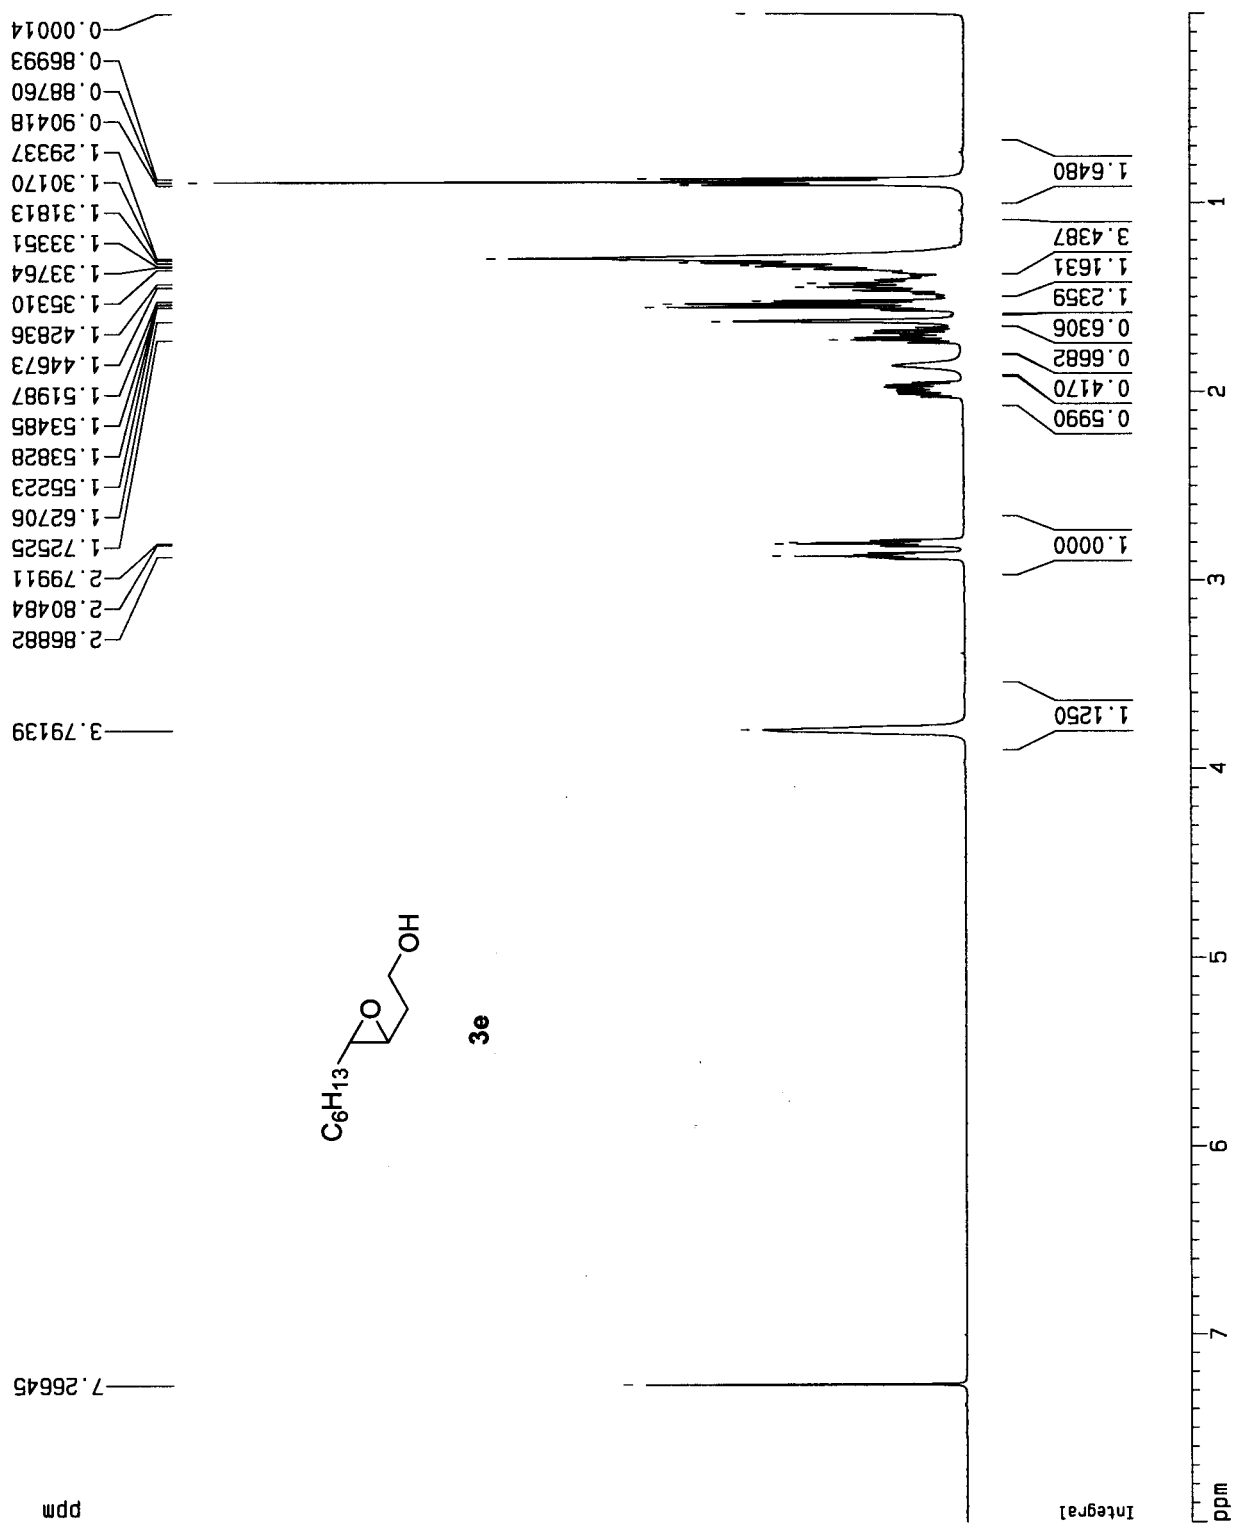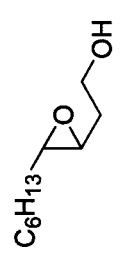

Current Data Parameters  
 NAME HAA-cis-Et  
 EXPNO 1  
 PROCNO 1

F2 - Acquisition Parameters  
 Date\_ 20051205  
 Time 0.06  
 INSTRUM spect  
 PROBHD 5 mm GNP 1H  
 PULPROG zg  
 TD 16384  
 SOLVENT CDCl3  
 NS 7  
 DS 0  
 SWH 7183.908 Hz  
 FIDRES 0.438471 Hz  
 AQ 1.1403764 sec  
 RG 64  
 DW 69.600 USEC  
 DE 6.00 USEC  
 TE 300.0 K  
 D1 2.0000000 sec

===== CHANNEL f1 =====  
 NUC1 1H  
 P1 10.50 usec  
 PL1 0.00 dB  
 SF01 400.1328009 MHz

F2 - Processing parameters  
 SI 32768  
 SF 400.1300097 MHz  
 WDW EM  
 SSB 0  
 LB 0.30 Hz  
 GB 0  
 PC 1.00

ID NMR plot parameters  
 CX 20.00 cm  
 F1P 8.000 ppm  
 F1 3201.04 Hz  
 F2P 0.000 ppm  
 F2 0.00 Hz  
 PPMCM 0.40000 ppm/cm  
 HZCM 160.05200 Hz/cm

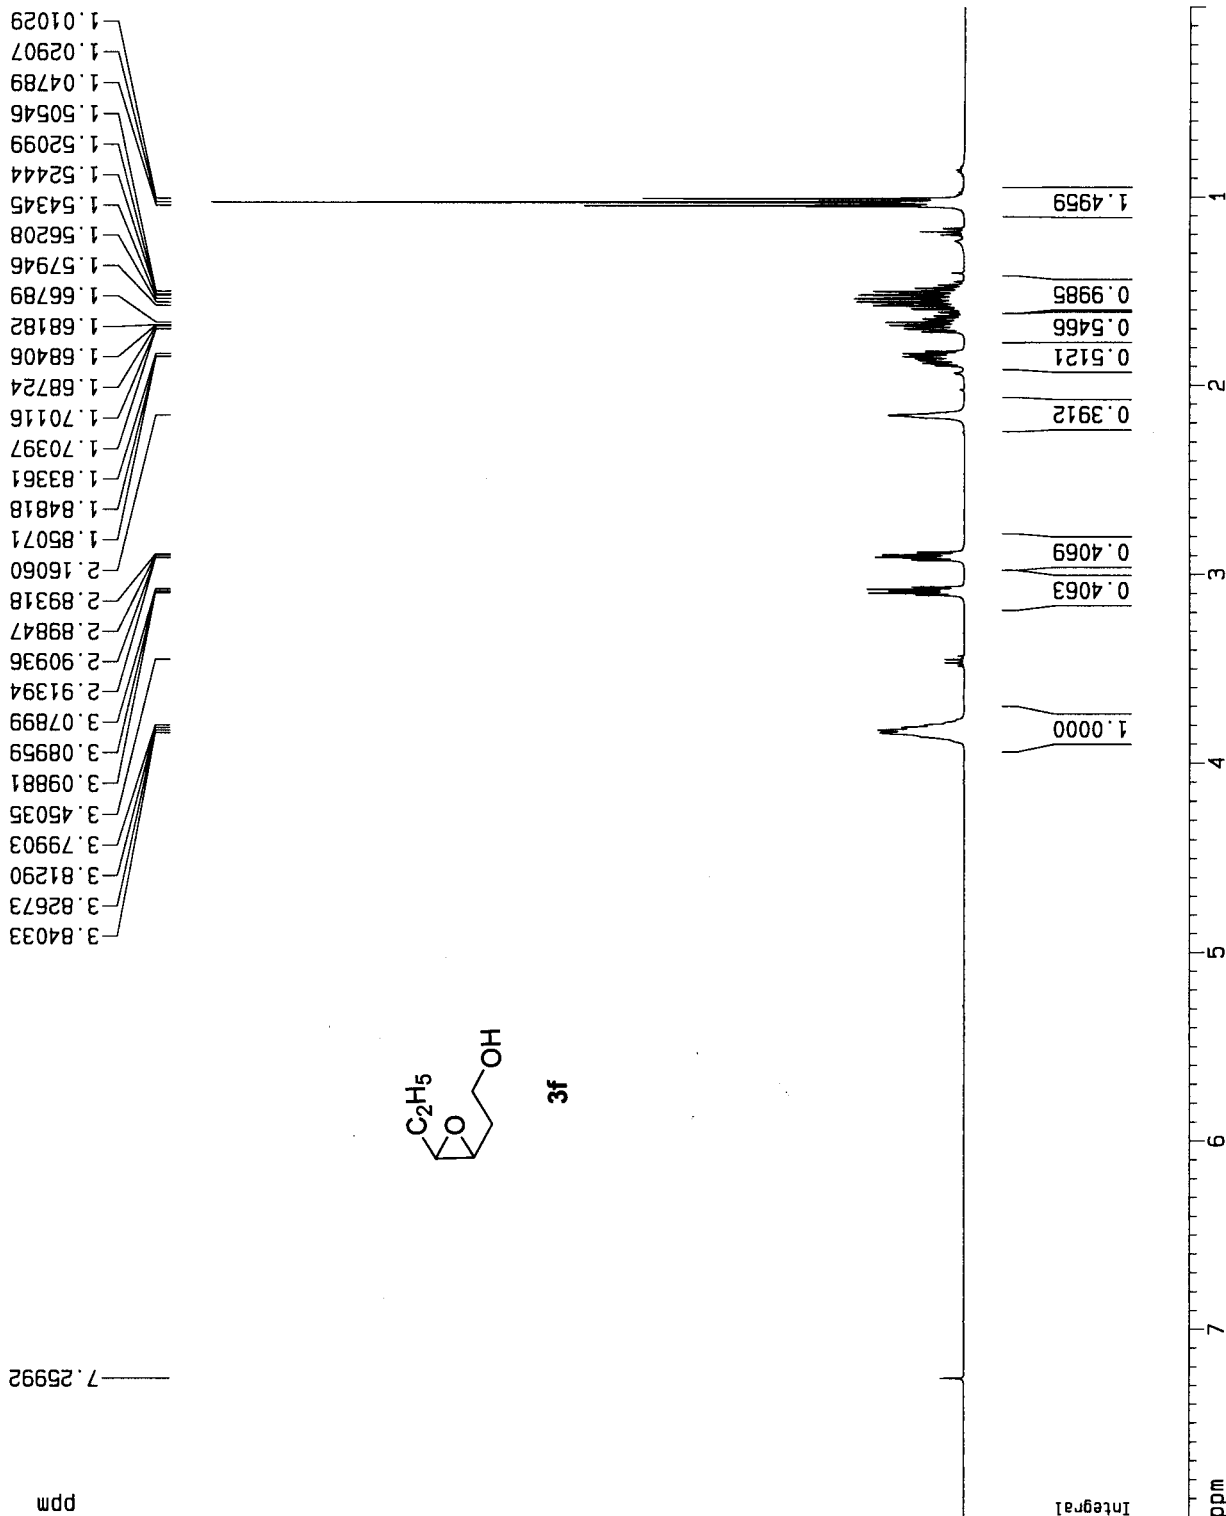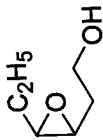

3f

Current Data Parameters  
 NAME ZX-cis-3  
 EXPNO 1  
 PROCNO 1

F2 - Acquisition Parameters  
 Date\_ 20061009  
 Time 12.53  
 INSTRUM spect  
 PROBHD 5 mm QNP 1H  
 PULPROG zg  
 TD 16384  
 SOLVENT CDC13  
 NS 4  
 DS 0  
 SMH 4807.692 Hz  
 FIDRES 0.293438 Hz  
 AQ 1.7039860 sec  
 RG 90.5  
 DW 104.000 USEC  
 DE 6.00 USEC  
 TE 300.0 K  
 D1 2.00000000 sec

===== CHANNEL f1 =====  
 NUC1 1H  
 P1 10.50 usec  
 PL1 0.00 dB  
 SF01 400.1320007 MHz

F2 - Processing parameters  
 SI 32768  
 SF 400.1300045 MHz  
 WDW EM  
 SSB 0  
 LB 0.30 Hz  
 GB 0  
 PC 1.00

1D NMR plot parameters  
 CX 20.00 cm  
 F1P 8.000 ppm  
 F1 3201.04 Hz  
 F2P 0.000 ppm  
 F2 0.00 Hz  
 PPMCM 0.40000 ppm/cm  
 HZCM 160.05200 Hz/cm

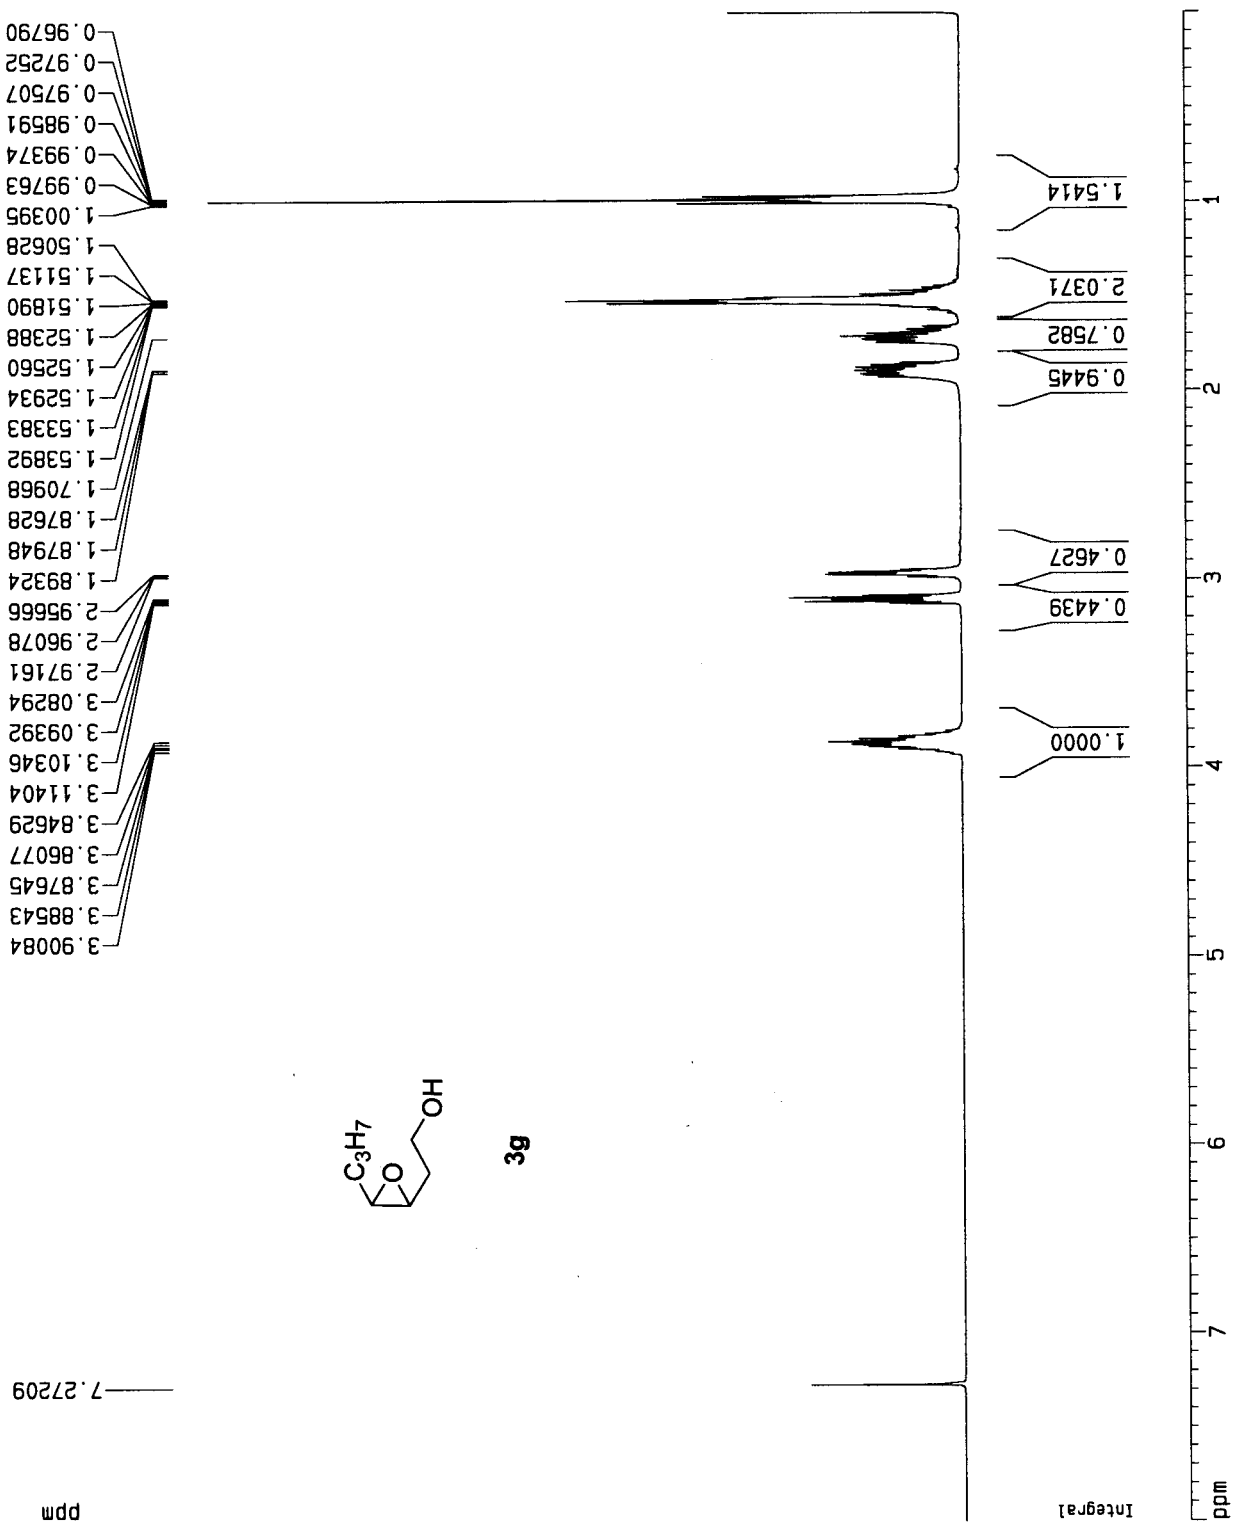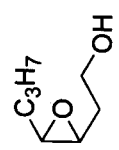

3g

Current Data Parameters

NAME ZX--cis-4  
 EXPNO 1  
 PROCNO 1

F2 - Acquisition Parameters

Date\_ 20061009  
 Time 12:59  
 INSTRUM spect  
 PROBHD 5 mm QNP 1H  
 PULPROG zg  
 TD 16384  
 SOLVENT CDC13  
 NS 8  
 DS 0  
 SWH 4807.692 Hz  
 FIDRES 0.293438 Hz  
 AQ 1.7039860 sec  
 RG 101.5  
 DM 104.000 usec  
 DE 6.00 usec  
 TE 300.0 K  
 D1 2.00000000 sec

==== CHANNEL f1 =====

NUC1 1H  
 P1 10.50 usec  
 PL1 0.00 dB  
 SF01 400.1320007 MHz

F2 - Processing parameters

SI 32768  
 SF 400.1300057 MHz  
 WDW EM  
 SSB 0  
 LB 0.30 Hz  
 GB 0  
 PC 1.00

1D NMR plot parameters

CX 20.00 cm  
 F1P 8.000 ppm  
 F1 3201.04 Hz  
 F2P 0.000 ppm  
 F2 0.00 Hz  
 PPMCM 0.40000 ppm/cm  
 HZCM 160.05200 Hz/cm

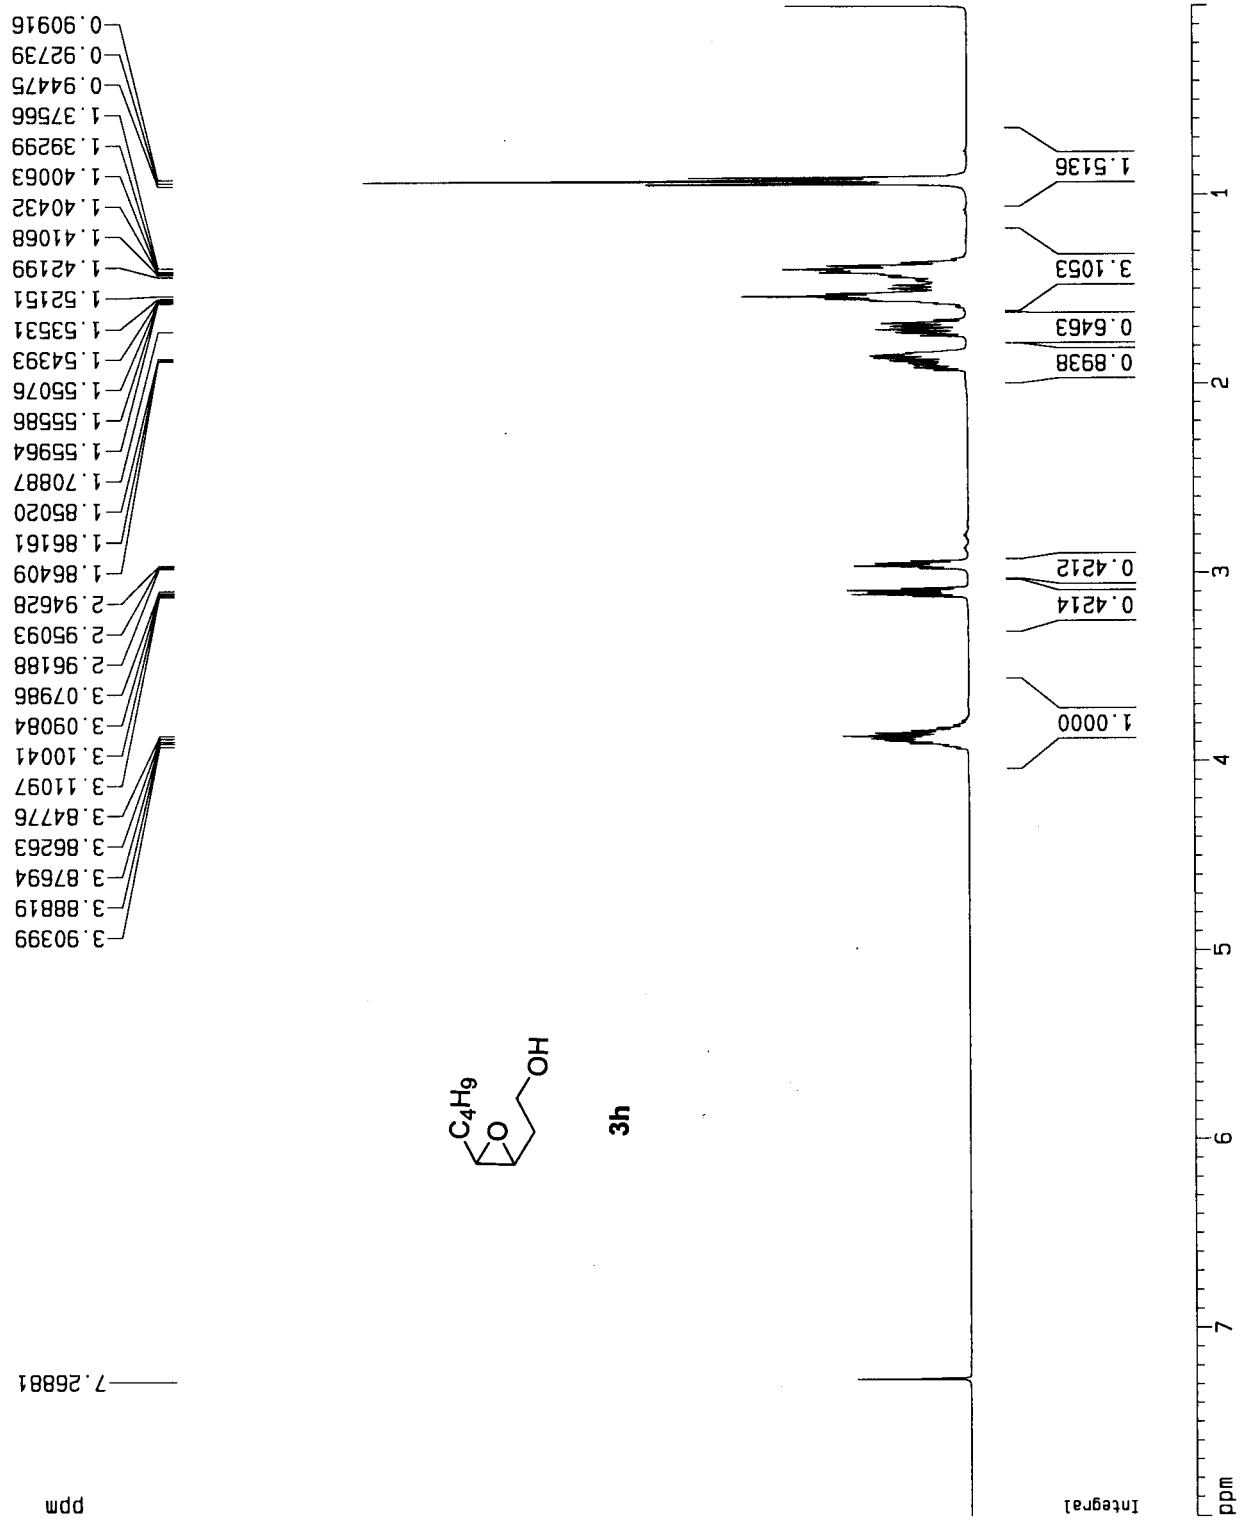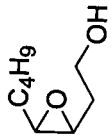

3h



Current Data Parameters  
 NAME N-p  
 EXPNO 1  
 PROCNO 1

F2 - Acquisition Parameters  
 Date\_ 20060209  
 Time 18.52  
 INSTRUM spect  
 PROBHD 5 mm QNP 1H  
 PULPROG zg  
 TD 16384  
 SOLVENT CDCl3  
 NS 8  
 DS 0  
 SWH 4807.692 Hz  
 FIDRES 0.293438 Hz  
 AQ 1.7039860 sec  
 RG 4.5  
 DM 104.000 usec  
 DE 6.00 usec  
 TE 300.0 K  
 D1 2.0000000 sec

=====  
 CHANNEL f1  
 =====

NUC1 1H  
 P1 10.50 usec  
 PL1 0.00 dB  
 SF01 400.1320007 MHz

F2 - Processing parameters  
 SI 32768  
 SF 400.1299589 MHz  
 MDW EM  
 SSB 0  
 LB 0.30 Hz  
 GB 0  
 PC 1.00

1D NMR plot parameters  
 CX 20.00 cm  
 F1P 8.000 ppm  
 F1 3201.04 Hz  
 F2P 0.000 ppm  
 F2 0.000 Hz  
 PPMCM 0.40000 ppm/cm  
 HZCM 160.05197 Hz/cm

0.88442  
 0.90258  
 0.91993  
 1.33099  
 1.33970  
 1.34840  
 1.35774  
 1.50452  
 1.51554  
 1.52203  
 1.53700  
 1.65935  
 1.67462

2.95325  
 2.96428  
 3.08496  
 3.09368  
 3.10453  
 3.48889  
 3.78174  
 3.79447  
 3.79902  
 3.80606

1.3693  
 1.9639  
 2.0161  
 0.5276  
 0.5019  
 0.4357  
 0.4357  
 0.4519  
 1.0000

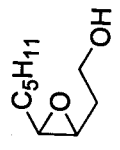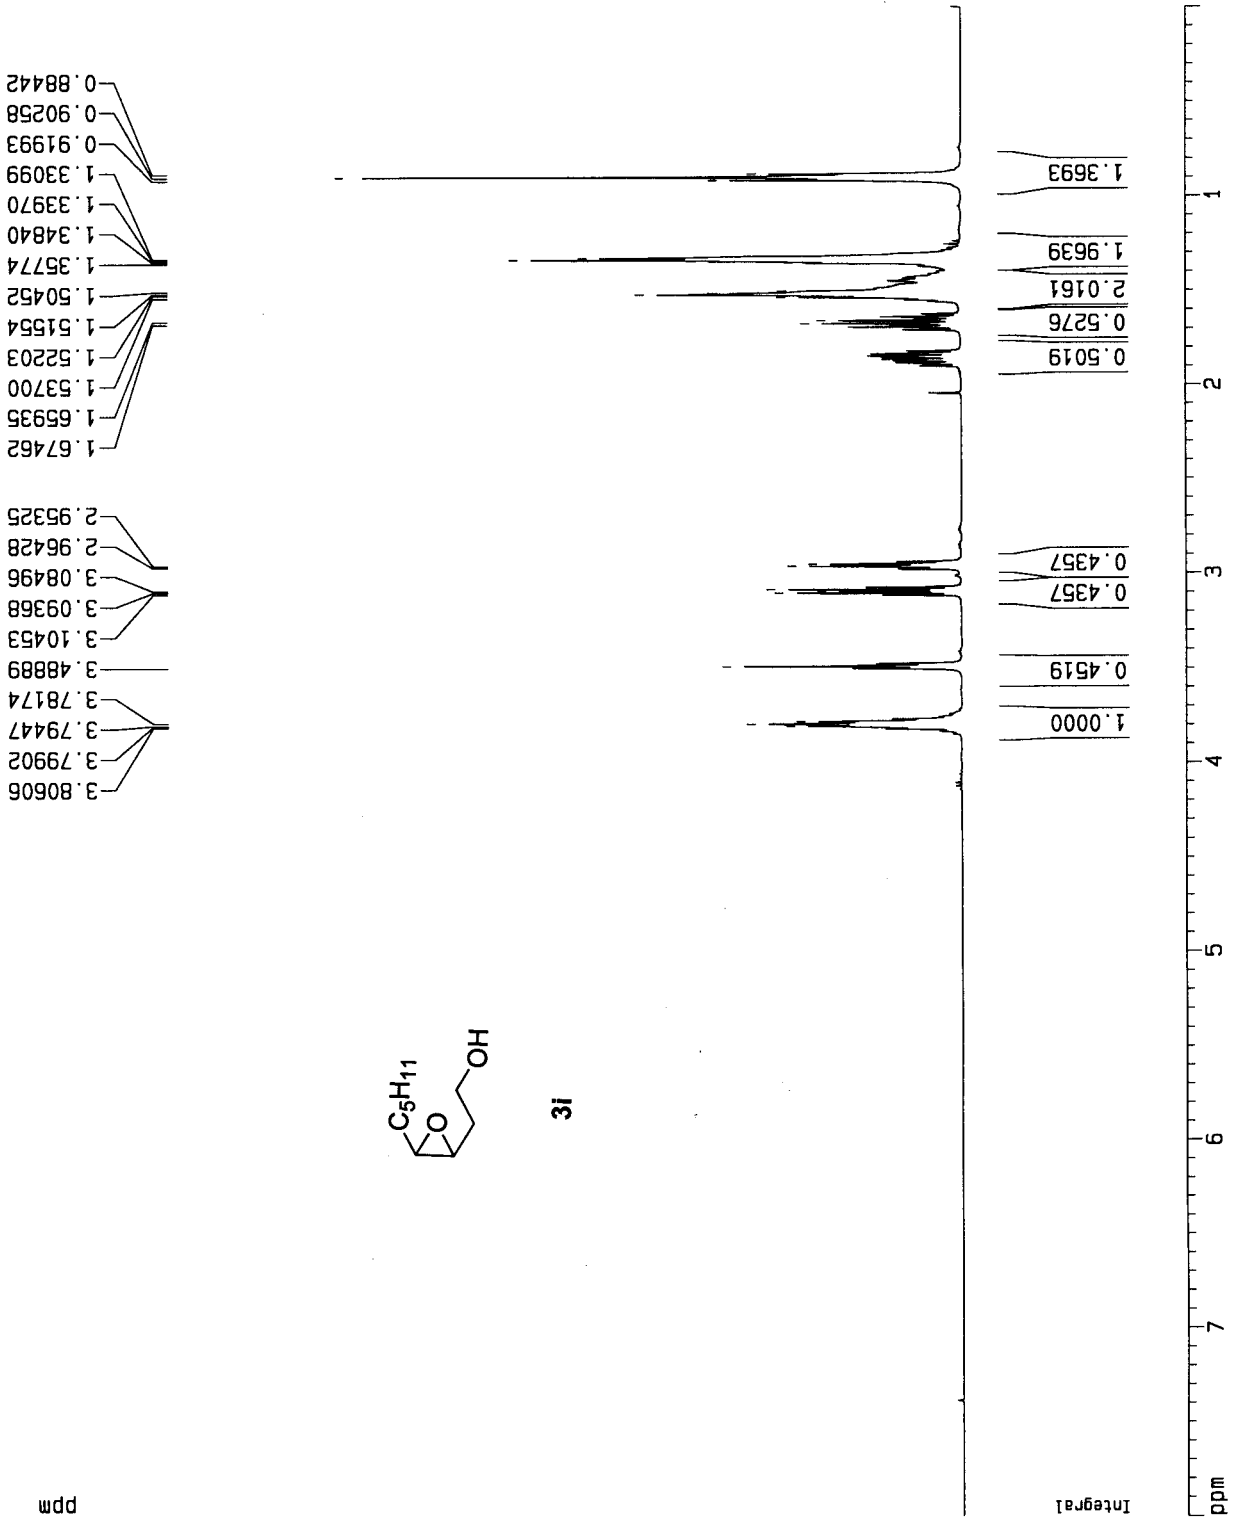

ppm

Integral

ppm
